# Supplementary material for: An Investigation of the Relationship between Henoch-Schönlein Purpura and Viral Infection in Korea Using the Health Insurance Database
Source: MDPI journal article supplement (doi:10.3390/jcm13051290), 2024-02-24

## *Supplementary Materials*

### **TABLES**

**Table S1.** Yearly incidence of Henoch-Schönlein purpura by age group between 2016 and 2019

| Age group | 2016 | 2017 | 2018 | 2019 | Total |
|-----------|------|------|------|------|-------|
| 0-4       | 1080 | 1029 | 964  | 820  | 3893  |
| 5-9       | 1640 | 1693 | 1674 | 1320 | 6327  |
| 10-14     | 456  | 461  | 508  | 430  | 1855  |
| 15-19     | 295  | 265  | 222  | 206  | 988   |
| 20-29     | 486  | 527  | 507  | 455  | 1975  |
| 30-39     | 531  | 478  | 469  | 480  | 1958  |
| 40-49     | 512  | 480  | 477  | 461  | 1930  |
| 50-59     | 677  | 631  | 592  | 571  | 2471  |
| 60-69     | 518  | 462  | 480  | 501  | 1961  |
| ≥70       | 546  | 557  | 468  | 514  | 2085  |
| Total     | 6741 | 6583 | 6361 | 5758 | 25443 |

**Table S2.** Yearly incidence of Henoch-Schönlein purpura in men between 2016 and 2019

| Age group | 2016 | 2017 | 2018 | 2019 | Total |
|-----------|------|------|------|------|-------|
| 0-4       | 525  | 524  | 478  | 427  | 1954  |
| 5-9       | 842  | 873  | 853  | 679  | 3247  |
| 10-14     | 216  | 238  | 259  | 210  | 923   |
| 15-19     | 131  | 130  | 96   | 85   | 442   |
| 20-29     | 152  | 183  | 170  | 152  | 657   |
| 30-39     | 188  | 173  | 164  | 177  | 702   |
| 40-49     | 218  | 213  | 215  | 182  | 828   |
| 50-59     | 272  | 258  | 225  | 230  | 985   |
| 60-69     | 239  | 221  | 233  | 224  | 917   |
| ≥70       | 250  | 280  | 210  | 228  | 968   |
| Total     | 3033 | 3093 | 2903 | 2594 | 11623 |

**Table S3.** Yearly incidence of Henoch-Schönlein purpura in women between 2016 and 2019

| Age group | 2016 | 2017 | 2018 | 2019 | Total |
|-----------|------|------|------|------|-------|
| 0-4       | 555  | 505  | 486  | 393  | 1939  |
| 5-9       | 798  | 820  | 821  | 641  | 3080  |
| 10-14     | 240  | 223  | 249  | 220  | 932   |
| 15-19     | 164  | 135  | 126  | 121  | 546   |
| 20-29     | 334  | 344  | 337  | 303  | 1318  |
| 30-39     | 343  | 305  | 305  | 303  | 1256  |
| 40-49     | 294  | 267  | 262  | 279  | 1102  |
| 50-59     | 405  | 373  | 367  | 341  | 1486  |
| 60-69     | 279  | 241  | 247  | 277  | 1044  |
| ≥70       | 296  | 277  | 258  | 286  | 1117  |
| Total     | 3708 | 3490 | 3458 | 3164 | 13820 |

**Table S4.** Positivity rates of virus during the study period

| <b>Mon</b>    | Jan   | Feb   | Mar   | Apr   | May   | Jun   | Jul   | Aug   | Sep   | Oct   | Nov   | Dec   |
|---------------|-------|-------|-------|-------|-------|-------|-------|-------|-------|-------|-------|-------|
| <b>PDR(%)</b> |       |       |       |       |       |       |       |       |       |       |       |       |
| <b>HAdV</b>   |       |       |       |       |       |       |       |       |       |       |       |       |
| 2016          | 9.18  | 3.88  | 3.93  | 5.54  | 6.53  | 6.95  | 7.16  | 9.48  | 9.58  | 6.50  | 5.83  | 3.24  |
| 2017          | 3.72  | 2.53  | 2.43  | 2.74  | 6.05  | 4.73  | 2.96  | 5.18  | 4.33  | 3.78  | 4.73  | 2.60  |
| 2018          | 2.98  | 2.80  | 4.25  | 5.38  | 5.45  | 6.80  | 5.82  | 9.55  | 13.33 | 11.30 | 10.70 | 7.63  |
| 2019          | 6.68  | 5.05  | 4.85  | 4.43  | 7.84  | 10.40 | 7.52  | 12.88 | 10.20 | 9.44  | 9.75  | 8.83  |
| <b>HPIV</b>   |       |       |       |       |       |       |       |       |       |       |       |       |
| 2016          | 2.24  | 1.30  | 1.40  | 5.60  | 16.55 | 16.23 | 9.68  | 10.25 | 8.68  | 4.56  | 1.95  | 0.78  |
| 2017          | 1.58  | 1.70  | 2.98  | 8.38  | 19.43 | 12.83 | 9.68  | 8.95  | 4.60  | 3.04  | 3.33  | 2.68  |
| 2018          | 0.84  | 1.60  | 3.25  | 9.44  | 19.10 | 16.78 | 11.12 | 7.75  | 4.33  | 4.00  | 1.75  | 1.03  |
| 2019          | 1.06  | 1.10  | 2.33  | 3.48  | 13.56 | 20.35 | 15.74 | 9.70  | 7.58  | 3.98  | 2.55  | 1.65  |
| <b>HRSV</b>   |       |       |       |       |       |       |       |       |       |       |       |       |
| 2016          | 8.56  | 1.00  | 1.43  | 0.56  | 0.70  | 0.15  | 0.34  | 0.28  | 1.78  | 6.46  | 17.83 | 13.02 |
| 2017          | 5.16  | 3.83  | 2.53  | 0.64  | 0.10  | 0.23  | 0.60  | 0.85  | 3.30  | 5.24  | 17.25 | 10.73 |
| 2018          | 4.58  | 4.25  | 3.65  | 0.64  | 0.50  | 0.40  | 0.72  | 1.05  | 1.55  | 4.52  | 13.95 | 11.20 |
| 2019          | 6.40  | 3.80  | 1.65  | 0.70  | 0.44  | 0.10  | 0.10  | 0.85  | 1.68  | 3.72  | 10.10 | 11.73 |
| <b>IFV</b>    |       |       |       |       |       |       |       |       |       |       |       |       |
| 2016          | 15.24 | 47.55 | 36.95 | 26.60 | 5.00  | 0.70  | 0.22  | 0.28  | 0.25  | 0.40  | 0.80  | 35.50 |
| 2017          | 26.20 | 7.70  | 8.95  | 12.72 | 5.03  | 2.20  | 1.10  | 0.55  | 0.93  | 0.66  | 4.05  | 41.55 |
| 2018          | 58.50 | 35.63 | 10.55 | 3.46  | 2.80  | 1.08  | 0.50  | 0.30  | 0.58  | 1.78  | 11.15 | 35.35 |
| 2019          | 28.20 | 9.13  | 20.80 | 34.85 | 10.52 | 2.10  | 0.40  | 0.35  | 0.63  | 3.44  | 10.08 | 23.95 |
| <b>HCoV</b>   |       |       |       |       |       |       |       |       |       |       |       |       |
| 2016          | 7.96  | 3.98  | 4.95  | 4.26  | 4.90  | 3.08  | 3.94  | 4.53  | 4.68  | 4.24  | 7.80  | 9.82  |
| 2017          | 10.26 | 6.45  | 5.15  | 3.62  | 2.68  | 2.35  | 1.02  | 1.45  | 1.55  | 2.14  | 5.15  | 7.20  |
| 2018          | 6.76  | 9.88  | 7.73  | 3.52  | 0.85  | 0.48  | 1.00  | 3.13  | 2.60  | 5.80  | 10.93 | 9.83  |
| 2019          | 5.48  | 3.70  | 2.83  | 1.38  | 0.92  | 1.68  | 0.64  | 0.45  | 1.05  | 1.94  | 3.35  | 7.55  |
| <b>HRV</b>    |       |       |       |       |       |       |       |       |       |       |       |       |
| 2016          | 8.52  | 3.78  | 12.28 | 15.44 | 19.55 | 16.38 | 19.62 | 19.60 | 18.40 | 24.56 | 20.68 | 8.02  |
| 2017          | 9.56  | 15.40 | 20.90 | 18.66 | 14.78 | 17.78 | 21.40 | 30.63 | 33.10 | 24.68 | 23.88 | 6.83  |
| 2018          | 2.52  | 5.95  | 20.63 | 28.34 | 21.53 | 20.18 | 21.14 | 12.70 | 24.63 | 22.08 | 15.70 | 9.78  |

|                           |       |       |       |       |       |       |       |       |       |       |       |       |
|---------------------------|-------|-------|-------|-------|-------|-------|-------|-------|-------|-------|-------|-------|
| 2019                      | 8.68  | 14.33 | 18.85 | 16.43 | 19.82 | 17.45 | 23.00 | 13.45 | 21.48 | 22.62 | 19.65 | 11.45 |
| <b>HBoV</b>               |       |       |       |       |       |       |       |       |       |       |       |       |
| 2016                      | 1.06  | 0.83  | 1.93  | 3.86  | 4.55  | 2.80  | 1.06  | 1.15  | 0.83  | 0.30  | 0.25  | 0.30  |
| 2017                      | 0.58  | 1.00  | 1.35  | 4.66  | 9.33  | 3.98  | 0.82  | 0.30  | 0.25  | 0.18  | 0.20  | 0.58  |
| 2018                      | 0.26  | 0.70  | 0.10  | 0.88  | 4.35  | 7.18  | 5.78  | 0.55  | 0.63  | 0.60  | 0.85  | 0.88  |
| 2019                      | 0.52  | 0.58  | 1.40  | 1.78  | 4.88  | 11.78 | 8.22  | 2.00  | 2.05  | 1.16  | 1.20  | 1.10  |
| <b>HMPV</b>               |       |       |       |       |       |       |       |       |       |       |       |       |
| 2016                      | 3.56  | 4.20  | 8.05  | 12.64 | 8.53  | 2.83  | 0.66  | 1.20  | 0.98  | 0.42  | 1.05  | 1.14  |
| 2017                      | 4.76  | 11.10 | 16.38 | 14.14 | 4.80  | 0.63  | 0.56  | 0.10  | 0.00  | 0.76  | 0.60  | 0.28  |
| 2018                      | 0.86  | 2.95  | 8.60  | 19.12 | 15.33 | 6.00  | 2.82  | 0.73  | 0.48  | 0.08  | 0.18  | 0.15  |
| 2019                      | 0.62  | 1.68  | 6.60  | 9.60  | 17.10 | 8.88  | 4.24  | 2.98  | 1.95  | 1.18  | 0.70  | 1.63  |
| <b>Group A Rotavirus</b>  |       |       |       |       |       |       |       |       |       |       |       |       |
| 2016                      | 5.66  | 16.45 | 21.08 | 13.28 | 6.03  | 3.73  | 2.30  | 4.20  | 3.43  | 1.86  | 1.68  | 2.76  |
| 2017                      | 10.38 | 21.68 | 30.33 | 20.26 | 8.13  | 5.53  | 1.68  | 2.30  | 3.45  | 2.34  | 4.35  | 7.38  |
| 2018                      | 14.52 | 19.53 | 16.88 | 10.10 | 4.38  | 4.55  | 1.84  | 1.98  | 0.85  | 1.90  | 3.13  | 4.10  |
| 2019                      | 5.06  | 11.88 | 13.48 | 4.93  | 5.12  | 0.90  | 1.32  | 1.45  | 1.00  | 0.96  | 3.60  | 2.75  |
| <b>Norovirus</b>          |       |       |       |       |       |       |       |       |       |       |       |       |
| 2016                      | 38.62 | 21.85 | 20.33 | 13.64 | 7.80  | 4.08  | 3.66  | 3.40  | 2.65  | 9.32  | 28.58 | 41.06 |
| 2017                      | 30.28 | 20.00 | 21.08 | 19.18 | 18.58 | 10.40 | 3.72  | 6.20  | 4.23  | 8.06  | 33.40 | 39.58 |
| 2018                      | 25.46 | 19.20 | 10.78 | 15.74 | 9.30  | 9.90  | 4.34  | 3.20  | 5.35  | 6.28  | 14.95 | 16.90 |
| 2019                      | 39.10 | 25.70 | 24.88 | 32.15 | 22.74 | 10.95 | 5.66  | 4.80  | 1.38  | 2.96  | 1.93  | 30.15 |
| <b>Enteric Adenovirus</b> |       |       |       |       |       |       |       |       |       |       |       |       |
| 2016                      | 2.28  | 2.58  | 1.25  | 2.30  | 2.28  | 2.75  | 2.16  | 3.43  | 10.73 | 6.88  | 5.68  | 6.78  |
| 2017                      | 2.10  | 2.23  | 0.55  | 2.86  | 2.90  | 3.05  | 2.78  | 3.30  | 3.50  | 5.04  | 3.43  | 1.13  |
| 2018                      | 2.40  | 1.85  | 2.55  | 3.04  | 2.85  | 5.65  | 4.44  | 6.45  | 6.03  | 3.82  | 3.33  | 2.15  |
| 2019                      | 0.00  | 0.85  | 2.08  | 2.25  | 2.00  | 2.18  | 1.26  | 4.08  | 1.43  | 1.00  | 0.80  | 1.28  |
| <b>Astrovirus</b>         |       |       |       |       |       |       |       |       |       |       |       |       |
| 2016                      | 0.94  | 1.18  | 2.48  | 3.20  | 3.40  | 4.30  | 2.52  | 2.28  | 3.43  | 2.82  | 2.05  | 0.86  |
| 2017                      | 11.96 | 1.15  | 1.73  | 5.54  | 3.90  | 4.08  | 3.32  | 2.30  | 1.78  | 2.08  | 0.68  | 2.58  |
| 2018                      | 0.94  | 1.73  | 0.00  | 1.82  | 3.05  | 2.50  | 2.74  | 5.18  | 5.63  | 3.98  | 2.73  | 2.33  |
| 2019                      | 1.44  | 3.05  | 2.70  | 0.98  | 1.26  | 2.20  | 3.14  | 1.50  | 3.23  | 1.28  | 4.80  | 1.50  |

---

**Table S5.** Age-based parameters of ARIMA models for patients with Henoch-Schönlein purpura

| Parameters       | 0-19.9 years | ≥20 years | Total |
|------------------|--------------|-----------|-------|
| p autoregressive | 0            | 1         | 0     |
| d difference     | 0            | 0         | 1     |
| q moving average | 2            | 0         | 0     |
| AIC              | 522.3        | 466.1     | 538.3 |

AIC, Akaike's Information Criterion.

## FIGURES

**Figure S1.** Residual ACF correlogram and 95% confidence limits for newly diagnosed Henoch-Schönlein purpura. ACF is a statistical technique to determine the degree of correlation between the values in a time series

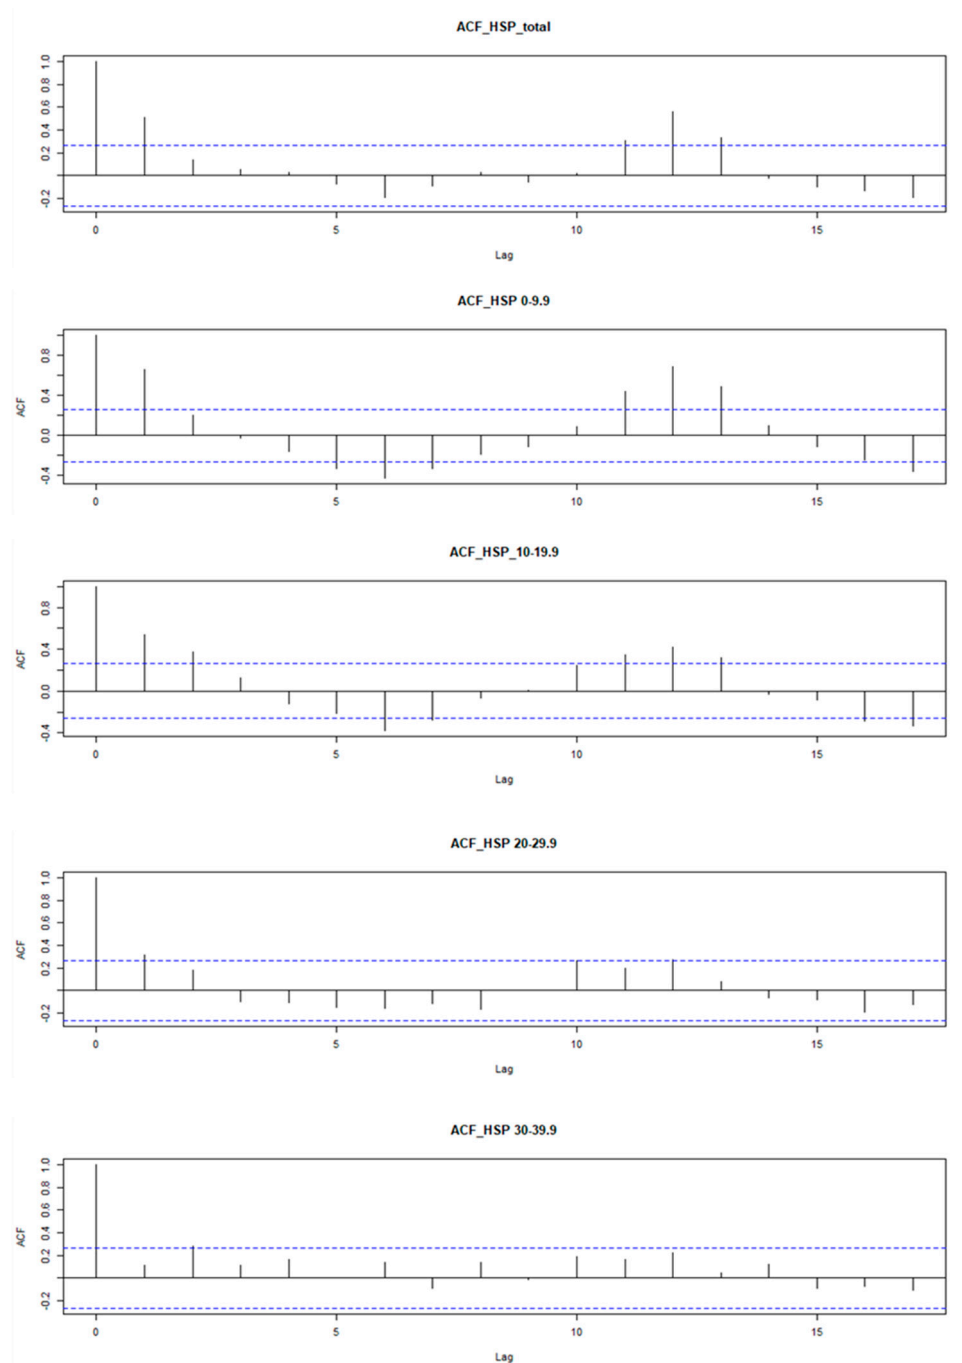

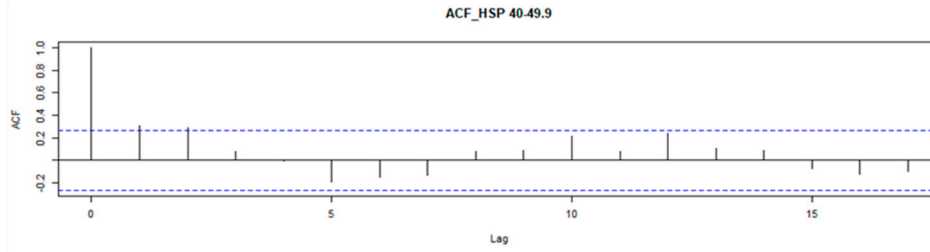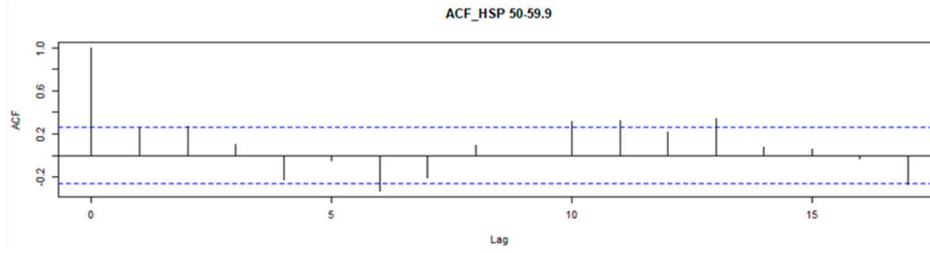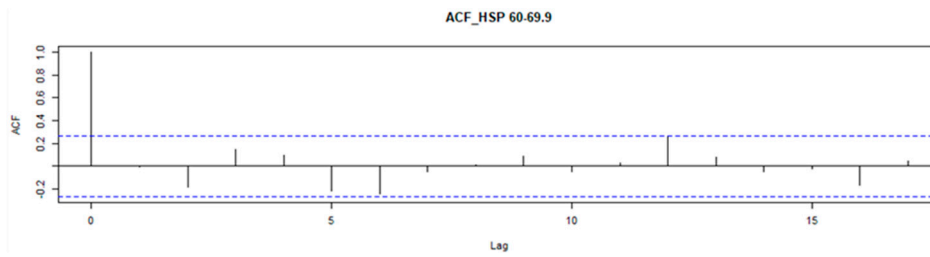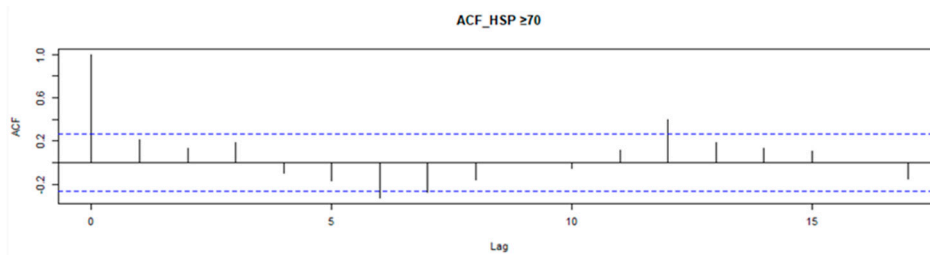

Supplement: s1 [file s1]
